# Supplementary material
Source: MDPI journal article supplement (https://www.mdpi.com/1424-8247/16/2/259)
Supplement: s1 [file s1]

Supplemental Table S1: Summary statistics calculated from cases in review

|                                           | <b>Cases of<br/>ICI-SSc (n= 4)</b>                                             | <b>Cases of<br/>ICI-Morphea (n= 5)</b>                                                                                                                        | <b>Cases of<br/>ICI-Eosinophilic fasciitis<br/>(n= 14)</b>                                                                                              |
|-------------------------------------------|--------------------------------------------------------------------------------|---------------------------------------------------------------------------------------------------------------------------------------------------------------|---------------------------------------------------------------------------------------------------------------------------------------------------------|
| <b>Median age*</b>                        | 66 years                                                                       | 53 years                                                                                                                                                      | 56 years                                                                                                                                                |
| <b>Malignancy types</b>                   | Melanoma 75%<br>Lung 25%                                                       | Melanoma 80%<br>Colorectal cancer 20%                                                                                                                         | Melanoma 64%<br>Lung 21%<br>Breast 7%<br>Bladder 7%                                                                                                     |
| <b>ICI use</b>                            | 0%                                                                             | 60%                                                                                                                                                           | 14%                                                                                                                                                     |
| Combination ICI                           | 75%                                                                            | 20%                                                                                                                                                           | 71%                                                                                                                                                     |
| Anti-PD-1                                 | 25%                                                                            | 0%                                                                                                                                                            | 14%                                                                                                                                                     |
| Anti-PDL1                                 | 0%                                                                             | 20%                                                                                                                                                           | 0%                                                                                                                                                      |
| Anti-PDL1 and Other                       |                                                                                |                                                                                                                                                               |                                                                                                                                                         |
| <b>Median onset after ICI<br/>start**</b> | 47 weeks                                                                       | 30 weeks                                                                                                                                                      | 56 weeks                                                                                                                                                |
| <b>Median duration of ICI-<br/>SSc**</b>  | 32 weeks                                                                       | 30 weeks                                                                                                                                                      | 26 weeks                                                                                                                                                |
| <b>Treatments used</b>                    | Steroids: 75%<br>Hydroxychloroquine:<br>25%<br>IVIg: 25%<br>Mycophenolate: 50% | Topical steroids: 60%<br>Systemic steroids: 60%<br>Colchicine: 20%<br>Cyclophosphamide: 20%<br>Rituximab: 20%<br>Hydroxychloroquine: 20%<br>Calcipotriol: 20% | Systemic steroids: 93%<br>Methotrexate: 57%<br>Cyclosporine: 7%<br>IVIg: 14%<br>Abatacept: 7%<br>Infliximab: 7%<br>Omalizuman: 7%<br>Mycophenolate: 14% |

\*Excluding non-exact ages, \*\*When known

CTLA4: cytotoxic T-lymphocyte-associated protein 4ICI: Immune checkpoint inhibitor, ICI-SSc: Immune checkpoint inhibitor associated systemic sclerosis, PD1: Programmed cell death protein 1, PD-L1: Programmed death-ligand 1
